# Supplementary material
Source: PubMed Central journal article supplement (PMC1820687)

*Fgfr3c*<sup>+/-</sup>

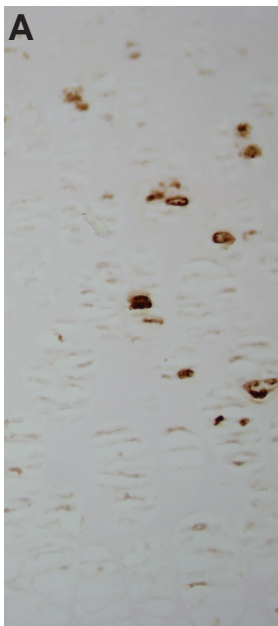

*Fgfr3c*<sup>-/-</sup>

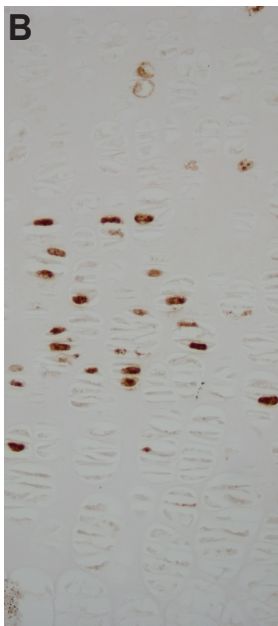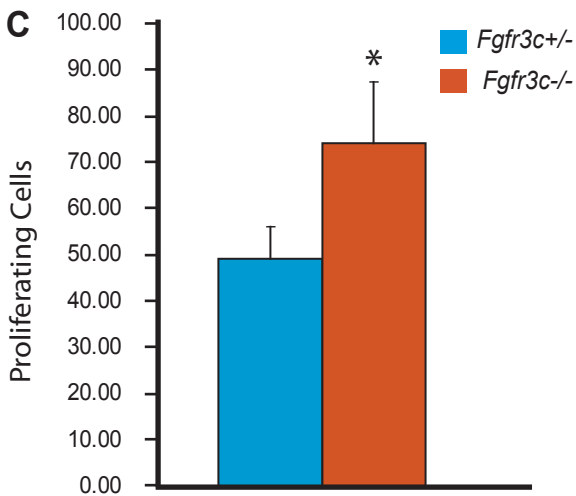

Supplement: pnas_0700012104_1.pdf [file pnas_0700012104_1.pdf]
